# Supplementary material for: Early [18F]Fluorodeoxyglucose Positron Emission Tomography at Two Days of Gefitinib Treatment Predicts Clinical Outcome in Patients with Adenocarcinoma of the Lung
Source: Oxford University Press journal article supplement (doi:10.1158/1078-0432.ccr-11-0868), 2011-10-21
Supplement: 10780432ccr110868-sup-fl1_pdf_73k.pdf [file 10780432ccr110868-sup-fl1_pdf_73k.pdf]

## Figure Legend

**Fig. 1.** A, Overall survival (OS) of metabolic responders ( $\Delta\text{SUV}\% < -25\%$ ) and nonresponders ( $\Delta\text{SUV}\% \geq -25\%$ ) at 2 days (median, 762 days versus 512 days;  $P = 0.640$ ). B, OS of metabolic responders ( $\Delta\text{SUV}\% < -20\%$ ) and nonresponders ( $\Delta\text{SUV}\% \geq -20\%$ ) at 2 days (median, 762 days versus 490 days;  $P = 0.827$ ). C, OS of metabolic responders ( $\Delta\text{SUV}\% < -25\%$ ) and nonresponders ( $\Delta\text{SUV}\% \geq -25\%$ ) at 1 month (median, 762 days versus 490 days;  $P = 0.937$ ). One patient did not have an FDG-PET scan at 1 month, without missing a CT scan. D, OS of morphologic responders and nonresponders at 1 month (median, 705 days versus 807 days;  $P = 0.392$ ). E, OS according to a single PET activity at 2 days ( $\text{SUV} < 7$ , black;  $\text{SUV} \geq 7$ , grey; median, 765 days versus 416 days;  $P = 0.066$ ).  $P$  values were obtained using the log-rank test.
